# Supplementary material for: Visual information is broadcast among cortical areas in discrete channels
Source: eLife. 2026 Mar 24;13:RP97848. doi: 10.7554/eLife.97848 (PMC13012721; doi:10.7554/eLife.97848)
Supplement: Supplementary file 1. [file elife-97848-supp1.xlsx]

## Sheet: Sheet1
Gratings stimuli											Grating and natural video combo stimuli
Animal ID	Recording areas				Total neurons per area				NC pairs		Animal ID	Recording areas		Total neurons per area		NC pairs (response to both stimuli)
421	LM		AL		147		58		20910		143	V1	LM	121	57	4005
421	LM		LM		93		19		6216		143	V1	LM	116	36	2415
493	V1		V1		48		21		2346		143	V1	LM	66	47	666
382	V1		LM		208		37		29890		144	V1	LM	119	3	1652
490	V1		LM		68		110		15576		144	V1	PM	53	65	666
490	V1		AL		63		69		8515		154	V1	AM/PM	247	118	3486
493	V1		AL		216		62		38226		154	V1	AM	145	107	3160
493	V1		LM		159		104		34191		154	V1	AM/PM	121	164	903
426	V1		AL		85		69		11781		154	V1	V1	135	134	8256
426	V1		LM		47		39		3655		156	V1	LM	129	87	7021
426	V1		PM		71		4		2628		156	V1	AL	171	38	6903
382	V1		LM		82		111		18336		166	V1	AL	304	162	10440
382	LM		LI		61		84		10296		167	V1	AL	161	117	5565
382	V1		AL		35		44		3003		170	V1	AL	352	163	10585
470	V1		AL		77		34		5778		171	V1	AL	119	19	1830
470	V1		V1		36		24		1711		171	V1	V1	161	123	5671
471	V1		PM		81		17		4753		211	V1	V1	100	169	3486
471	V1		LM		20		29		1128		633	V1	LM	85	150	2415
471	V1		V1		105		40		10440		633	V1	V1	144	100	6441
391	V1		PM		51		22		2628		635	V1	LM	94	141	2211
391	V1		V1		33		26		1711		657	V1	LM	37	47	378
417	V1		AL		84		40		7626		657	V1	LM	37	79	276
417	V1		LM		59		9		2278		635	V1	AL	400	275	32385
400	V1		PM		11		7		153		635	V1	V1	287	343	36315
400	V1		AL		18		7		300
532	V1		PM		302		52		62128
540	V1		AL		17		13		435		Combo	Total neurons	Total animals	Total within-area NC pair (response to both stimuli)
557	V1		LI		199		90		41616
559	V1		LM		18		18		630		V1:	4573	12	45203
577	V1		PM		21		41		1891		LM:	647	6	22850
459	V1	AL	LM		24	116	25		13530		AL:	774	6	6963
513	V1	LM	LI		40	90	43		14878		'AM/PM'	454	2	871
557	V1	PM	AL		283	69	18		68265
560	V1	V1	PM		100	127	28		32385
576	V1	V1	PM		38	86	88		22366		Gratings	Total neurons	Total animals	Total within-area NC pair
577	V1	AL	LM		117	123	11		31375
459	V1	PM	V1	AL	286	13	57	68	89676		V1:	6735	23	675569
525	V1	PM	AL	LM	214	204	187	113	256686		LM:	2076	17	143581
533	V1	AL	LM	LI	157	91	74	47	67528		AL:	1352	14	79173
540	V1	V1	LM	LI	38	39	9	3	3916		LI:	593	8	25148
578	V1	V1	PM	AM	130	56	24	51	33670		'AM/PM'	786	12	38343
560	V1	V1	PM	PM	217	305	74	92	234955
560	V1	V1	LM	AL	359	273	92	190	416328
540	V1	AL	LM	LI	113	163	61	62	79401
559	V1	LM	LM	LI	315	262	203	33	326836
632	V1	V1	LM	LI	290	306	139	99	343206
633	V1	V1	LM	LI	197	243	220	132	311655
